# Supplementary material for: Big data analytics frameworks for the influence of gut microbiota on the development of tic disorder
Source: Front Comput Neurosci. 2022 Aug 25;16:986591. doi: 10.3389/fncom.2022.986591 (PMC9452719; doi:10.3389/fncom.2022.986591)
Supplement: Supplementary Material 2 — Microbiota analysis. [file Data_Sheet_2.xlsx]

## Sheet: Sheet1
Metric\author	Zhao	Xi	Lee
Title	Gut microbiome in ADHD and its relation to neural reward anticipation.	Depicting the composition of gut microbiota in children with tic disorders: an exploratory study	Alterations of the intestinal microbiota were correlated with the severity of Tourette syndrome in children
Year	2020	2021	2018
Country	Beijing	Beijing	Taiwan
Demographic data of patients with TD and healthy controls
N =
Patients	5	49	24(mild ,10;severe 14)
Controls	1	50	11
Mean age (years)
Patients	8（7-10）	8.84（SD±2.35;range 4-14）	N/A
Controls	14	8.78（SD±2.26;range 4-14）	N/A
Male(m/f)
Patients	5/0	38/11	N/A
Controls	1/0	39/11	N/A
Mean BMI
Patients	18.0(13.2-26.3)	18.28(SD±2.99;range 13.72-25.39)	N/A
Controls	N/A	17.22(SD±2.66;range 12.76-24.73)	N/A
Clinical information
Diagnoses	TS	TS(23),PTD(17),CTD(9)	TS
Diagnostic classification	DSM-5	DSM-5	N/A
Disease duration（years）	1.5-4	2.11(SD±1.92;range 0.08-8)	severe tics compared with mild tics(54±28vs.27±30 months)
YGTSS scores	YGTSS-TTS> 13	36.71(SD±16.73;range 7-81)	TTS severe tics compared with mild tics (27.4 ± 7.5 vs. 14.8 ± 4.1)
Inclusion criteria	1. YGTSS-TTS > 13; 2.Had been diagnosed for more than one year, had a persistent high level of tic severity, and had a relapse or were intolerant to regular medications for tics disorders; 3. Stop using antimicrobial drugs or probiotics for more than 1 month.	1.age of 4-14 ; 2. met diagnostic criteria of TD according to the Diagnostic and Statistical Manual of Mental Disorders, Fifth Edition (DSM-5) (Association, 2013)	N/A
Exclusion criteria	N/A	1.the use of antibiotics, probiotics, high-dose vitamin or immunomodulatory medications within 4 weeks before the fecal sample collection.2.conditions like any infective diseases or other severe diseases that may influence the gut microbiota	N/A
Comorbidities	ADHD(3); variant asthma(1).	N/A	N/A
Medication	tiapride(3);aripiprazole(2);trihexyphenidyl(2);risperidone(1)	DRAs（including tiapride,aripiprazole,haloperidol,risperidone;(12);topiramate(1);valproate(1);treatment-naive(35)	N/A
Gastrointestinal disturbances	N/A	mild constipation (13/49) and abdominal pain (14/49)	N/A
GSI scores	N/A	2.31(SD±1.86;range 0-8)	N/A
Microbiota analysis
Samples	stool	stool	stool
Stool storage	−80°C	−80°C	N/A
Genetic quantification	Shotgun metagenomic sequencing	shotgun metagenomic sequencing	N/A
Alfa diversity:	a reduced OTU number in the α-diversity analysis	no significant difference of the bacterial community between the treatment-naive TD children (n = 35) and HC (n = 50)	N/A
Beta diversity	a clear cluster apart from the healthy control cluster in the β-diversity analysis	no significant difference between the treatment-naive TD children (n = 35) and HC (n = 50)	N/A
Bacterial diversities
Family
Bacteroidetes-Prevotellaceae			↓
Genus
Firmicutes-Oscillospiraceae-Ruminococcus			↑
Bacteroidetes-Prevotellaceae-Prevotella			↓(severe,14)
Actinobacteria-Bifidobacteriaceae-Bifidobacterium	↓
Actinobacteria-Coriobacteriaceae-Collinsella	↓
Firmicutes-Lachnospiraceae-Dorea	↓
Firmicutes-Coprobacillaceae-Catenibacterium	↓
Species
Firmicutes-Allisonella-Allisonella histaminiformans	↓
Bacteroidetes-Bacteroides coprocola	↓
Bacteroidetes-Bacteroides vulgatus	↑
Bacteroidetes-Bacteroides plebeius		↑
Firmicutes-Catenibacterium mitsuokai	↓
Firmicutes-Clostridium bartlettii			↓(severe,14)
Firmicutes-Dialister succinatiphilus	↓
Firmicutes-Holdemanella biformis	↓
Bacteroidetes-Prevotella stercorea		↓
Bacteroidetes-Prevotella copri			↓(severe,14)
Firmicutes-Roseburia faecis	↓
Firmicutes-Ruminococcus lactaris		↑
Firmicutes-Streptococcus lutetiensis		↓
Firmicutes-Subdoligranulum variabile			↓(severe,14)
Other findings	The number of non-redundant genes in TS patients was significantly decreased.	DRA-treated TD children had higher abundances of Bacteroides caccae, Bacteroides dorei, Escherichia coli, Ruminococcus gnavus, and Streptococcus parasanguinis and lower abundances of Akkermansia muciniphila, Megamonas hypermegale, Roseburia sp. CAG:303, and Eubacterium ventriosum.	The proportion of Prevotella was negatively correlated with the severity of tics.
		Bacteroides eggerthii,Bacteroides dorei,and Bacteroides thetaiotaomicron positive correlations with the YGTSS scores.
TD, Tic Disorder;TS,Tourette's Syndrome;ADHD,Attention-deficit Hyperactivity Disorder;HC,Health Control;GSI, Gastrointestinal Severity Index; YGTSS, Yale Global TicSeverity Scale; YGTSS-TTS, Yale Global TicSeverity Scale Total Tic Scale (combined motor tic and vocal tic score); DRA, dopamine receptor antagonist;OTU,operational taxonomic unit.
